# Supplementary material
Source: publisher figshare collection journal article supplement (https://gsapubs.figshare.com/ndownloader/files/26858861)
Supplement: Supplementary file 1 [file 26858861]

## Data Repository for

# Shutting down dust emission during the middle Holocene drought in the Sonoran Desert, Arizona

**Guy Tau<sup>1,2\*</sup>, Onn Crouvi<sup>2</sup>, Yehouda Enzel<sup>1</sup>, Nadya Teutsch<sup>2</sup>, Paul Ginoux<sup>3</sup>, and Craig Rasmussen<sup>4</sup>**

<sup>1</sup> *Institute of Earth Sciences, Hebrew University of Jerusalem, Jerusalem 9190401, Israel.*

<sup>2</sup> *Geological Survey of Israel, 32 Yeshayahu Leibowitz, Jerusalem 9692100, Israel.*

<sup>3</sup> *National Ocean and Atmospheric Administration, Geophysical Fluid Dynamics Laboratory, Princeton, NJ 08540, USA.*

<sup>4</sup> *Department of Environmental Science, University of Arizona, Tucson, AZ 85721, USA.*

## **1. Methods**

### **Current dust transport pathways and sources**

Current dust transport pathways in the Sonoran Desert (SD), Arizona were analyzed using the National Oceanic and Atmospheric Administration (NOAA) Hybrid Single Particle Lagrangian Integrated Trajectory (HYSPLIT) model-4 (Draxler and Hess, 1998). The calculations were applied to 17 dusty days in the study area, based on the global data assimilation system (GDAS) archive, a global model with a 1° latitude-longitude grid. Air parcel backward trajectories were computed at the model ground level from Montezuma Well (MW) for 24-h before each dust storm. The selection of dates for analyses was based on two different databases: (1) The NOAA storm event data-base of Maricopa county in Arizona that includes ground-based observation of dust storms and (2) PM-10 data from the IMPROVE network via the [United States Environmental Protection Agency Air Quality System \(EPA-AQS\) website](#), which measures aerosol concentrations and visibility. We examined the period from January 2011 to December 2019 and chose all days that exhibited above average PM-10 concentrations in Ikes Backbone, located 35 km south of MW. The IMPROVE network samplers collect 24-hour samples, every three days, and calculates the total dust

concentrations. Due to low temporal sampling resolution, short-lived dust storms can be masked. Thus, we chose days with PM-10 values higher than  $30 \mu\text{g}/\text{m}^3$  for summer and  $20 \mu\text{g}/\text{m}^3$  for winter. These values fit PM-10 values recorded from the IMPROVE network on known dusty days from NOAA storm event database. Moreover, selected dusty days air parcel trajectory's fits monitored modern dust movement from the SD (e.g. Breed and Reheis, 1999).

Current active dust sources in Arizona were identified using MODIS deep blue aerosol global data, based on a decadal high-resolution scale grid, as described by Ginoux et al. (2010). These data contain location of dust emission for different time scales (mostly in a day to a week). Hotspots were classified based on overlapped dust emission at the same geographical region throughout the dataset. The collocation of these hotspots with geomorphologic characteristics of preferential dust sources over the Chihuahuan desert has shown the potentiality of MODIS aerosol data to accurately detect dust sources (Baddock et al., 2016).

Active dust sources that were chosen for subsequent field sampling were only those that are located along current dust transport pathways observed in this study. All these dust sources were visited in the field, photographed, described, and surficial sediments (0 – 2 cm) of main geomorphic units in each source were sampled for laboratory analyses. Dust sources with high surficial coverage of vegetation and gravel, and/or that are characterized by medium to coarse sand texture (PSD mode coarser than  $200 \mu\text{m}$ ) were assumed as irrelevant for supplying dust to MW and therefore were not included in this paper.

#### Radiocarbon results and treatment

Age control was applied by combining the previous six  $^{14}\text{C}$  ages reported by Davis & Shafer (1992) with eight  $^{14}\text{C}$  samples that were analyzed in this study (Table S2). All previous samples (Davis & Shafer) were prepared and dated at the University of Arizona radiocarbon lab by AMS, except one sample dated by beta counting. New radiocarbon samples include charcoal/wood, Scrips seeds, large twig, twigs in varying sizes (as one sample) and insect wing. New samples were treated with acid-base-acid (1M HCl and 1M NaOH,  $75^\circ\text{C}$ ) prior to combustion. The samples were dated by AMS at the radiocarbon lab of the University of California, Irvine. Three new samples were rejected due to reversal ages. All rejected samples are twigs of varying sizes that were hand-picked from the same depth. Because the variety in size and shape it is probable

that small ancient twigs participate and accumulated in the MW leading to a reversal age. Age-depth model was processed using Bacon, a Bayesian statistics analysis age-depth modelling package in R software (Blaauw and Christeny, 2011), that uses the IntCal3 calibration curve (Reimer et al., 2013).

#### Sampling the Montezuma Well core

The MW core is stored in a refrigerated storage of the University of Arizona in Tucson, Arizona. The core was described, photographed and a new core stratigraphy was composed. Snails and clams are the major characteristics of the upper section (0 – 550 cm; <9.3 ka), whereas uniform black mud with roots dominates the lower section of the core. Angular white carbonate rock fragments (1 – 5 cm) appear throughout the core. Twigs of various sizes and shapes characterize the depth interval of 430 – 500 cm (7.6 – 9 ka). We did not observe any evidences of debris-flow during our core description. We sampled with a total of 82 sub-samples that were collected with 5 ml plastic containers at an average interval of 12 cm and have been stored in the soil lab at the Geological Survey of Israel.

#### Adjacent soils and local bedrock sampling

Two soil profiles located approximately one km north from MW (34.65 N and 111.75 W; Fig. S1) were sampled. Three soil samples were taken for each: top-soil (0 – 0.5 cm), b horizon (0.5 – 3 cm) and c horizon (3 – 6 cm) for soil-1, and top-soil (0 – 3 cm), b horizon (3 – 8 cm) and c horizon (8 – 12 cm) for soil-2. Moreover, the soils are patchy, and cover about 50% of the surface. Few (10% vol.) weathered bedrock carbonate clasts (1 – 5 cm) are evident in the soil profile, mainly in the lower part. In addition, three rock fragments of the local MW bedrock and four samples from an escarpment near the soil profile were collected, all of Verde Formation.

#### Chemical composition analyses

Samples were crushed using a ball mill (Pulverisette 2, FRITSCH, Germany) after samples went splitting protocol and <2mm sieving. Powdered samples were fully dissolved by sodium peroxide ( $\text{Na}_2\text{O}_2$ ) fusion (Brenner et al., 1980; Yu et al., 2001). Samples were prepared for major elements concentrations measurement by dilution (1:10,000) and additional Sc spiking as internal standard (final concentration of 5 mg/l) and measured by Inductively Coupled Plasma Optical Emission Spectrometry (ICP-OES, Optima 5300, Perkin Elmer, USA). Calibration was performed using commercial

elemental solutions. Four certified reference materials (CRMs; SO-1, SO-3, JLK-1, CCH) were processed and analyzed alongside the samples for determining and improving accuracy as well as 3 procedural blanks. Precision, accuracy, limit of detection (LOD) and procedural blank determinations are based upon four analysis sessions performed on different days and the results are shown in table S3. Precision was monitored by using two project standards resembling the MW core and Arizona's dust sources that were analyzed 15 times. Average precision value of Al, Fe and Ca is 2% and all better than 4%, 5% and 3%, respectively. Accuracy was determined on the four CRMs, as each CRM was analyzed 15 times. Accuracy average values of Al, Fe and Ca are 1%, 2% and 3%, respectively, and all better than 4% for Al and Fe, while Ca is better than 7%. The instrumental LOD was calculated on calibration blank analyzed 31 times throughout the four analytical session, yielding values of 0.08, 0.01 and 0.07 mg/l for Al, Fe and Ca, respectively. Procedural blanks included the entire sample processing protocol. The Al procedural blanks were found to be lower than the instrumental LOD, equivalent to <0.08 wt.% sample content. The Fe and Ca procedural blanks were determined as 0.01 and 0.7 wt.%, respectively.

Summer and winter chemical scores were calculated using the Al-Ca-Fe ternary diagram by projecting MW core samples towards a calculated summer or winter slope. The slope was calculated using linear regression over the entire summer or winter data points (without sub-categorizing such as alluvial fan, wash, etc.) that was forced to intercept at the origin axes (concentration of local bedrock). For each sample we calculated the projected relative distance between the summer and winter slopes. Thus, the relative ratio between summer and winter slopes was translated to their chemical score (in %). Core samples with relative Ca ratio (in the Al-Ca-Fe ternary diagram) higher than 90% were neglected as these represent mainly a bedrock source with negligible contribution of dust.

#### Particle size distribution (PSD)

Pretreatment of MW core samples, following Crouvi et al (2008) and Arcusa et al (2019) included: <2 mm sieving; sample splitting to 0.6 g aliquot, dissolving organic matter by shaking samples for 8 days with 20 mL of 10% NaOCl solution; calcium-carbonate removal with 25 mL 1M HCl shaken for 15 minutes; dissolving biogenic silica using 40 mL 10% Na<sub>2</sub>CO<sub>3</sub> for 5 hours in a drying oven at 80 ° C; heavy fluid (S.G = 1.8) separation; <125 µm sieving; dispersion using sodium hexametaphosphate

solution, stirring for 5 minutes and ultrasonication for 30 seconds. Soil samples were treated with <2mm sieving; sample splitting to 0.6 g, calcium-carbonate removal with 25 mL 1M HCl shaken for 15 minutes. Samples from dust sources were analyzed as bulk. All samples were analyzed using Malvern Mastersizer MS-2000 laser diffraction device that measures PSD over the range of 0.02-2000  $\mu\text{m}$ . Two to six replicate samples were subjected to three consecutive five seconds runs at a pump speed of 1800 RPM. The laser diffraction raw values were transformed into PSD using the Mie scattering model, with optical parameters of RI=1.52 and A=0.1. The soils mass of the > 2mm fraction of each sample was noted as well (Table S5).

#### End member modeling analysis (EMMA)

The EMMA approach considers compositional data constraints and provides sedimentological interpretable grain-size end members (EM); interpreted as proxies of sediment transport processes (Weltje, 1997; Weltje and Prins, 2003; Dietze et al., 2012). We used AnalySize MATLAB GUI package (Paterson and Heslop, 2015), designed specifically for unmixing PSD using least square measure for model quality and a non-negative matrix factorisation to estimate the EM distributions and abundance. Each individual EM value is calculated in (%) via the AnalySize package, and their results are presented in Fig 4 (Summer EM is the value, in %, of both EM 2 and 3).

#### Calculated dust and bedrock fluxes of MW core

Total dust flux was calculated using Al content of each sample, divided by the average Al of the local bedrock (equation 1). The equation considers the accumulation rate (AR), and bulk density ( $\rho$ ). Dust flux of individual EM was calculated by multiplying the total dust flux by the EM score.

$$\text{Dust Flux} \left[ \frac{\text{g}}{\text{cm}^2 \cdot \text{year}} \right] = \frac{\text{Al}_{\text{sample}}}{\text{Al}_{\text{local bedrock}}} \cdot \text{AR} \left[ \frac{\text{cm}}{\text{year}} \right] \cdot \rho_{\text{sample}} \left[ \frac{\text{g}}{\text{cm}^3} \right]. \quad (1)$$

Bedrock flux was calculated using Ca content of each sample (equation 2), divided by the average Ca of dust sources, assuming that most Ca originates from the local bedrock collapsed into the well:

$$\text{Bedrock Flux} \left[ \frac{\text{g}}{\text{cm}^2 \cdot \text{year}} \right] = \frac{\text{Ca}_{\text{sample}}}{\text{Ca}_{\text{Dust sources}}} \cdot \text{AR} \left[ \frac{\text{cm}}{\text{year}} \right] \cdot \rho_{\text{sample}} \left[ \frac{\text{g}}{\text{cm}^3} \right]. \quad (2)$$

A common practice for calculating dust flux includes dividing the dust immobile elemental proxy by the upper continental crust (UCC) value (equation 3) (Longman et

al., 2017; Pratte et al., 2017). Here, we divided the Al values of the samples by the local bedrock (depleted in Al), as it is obvious that the local carbonate is another potential source to the MW sediments. Hence, there is no benefit using the UCC values for MW. Due to low values of Al in the local bedrock (0.45 wt.%) compared to the UCC (8.2 wt.%), MW dust fluxes are relatively high compared to other calculated dust fluxes from the SW USA (Arcusa et al., 2019).

$$\text{Dust Flux} \left[ \frac{\text{g}}{\text{m}^2 \cdot \text{year}} \right] = \frac{Al_{\text{sample}}}{Al_{\text{UCC}}} \cdot AR \left[ \frac{\text{cm}}{\text{year}} \right] \cdot \rho_{\text{sample}} \left[ \frac{\text{g}}{\text{cm}^3} \right] \cdot 10,000 \left[ \frac{\text{cm}^2}{\text{m}^2} \right]. \quad (3)$$

### Raw results and proxies

The results of the MW core properties (depth, age, elemental composition, dust and bedrock flux, PSD, texture and scores) are shown in table S4; bedrock and soils properties (location, depth, PSD, texture and elemental composition) in table S5, and the dust sources properties (sampling location, vegetation and gravel cover, PSD, texture and chemical composition) in table S6 and S7. For the different calculated core proxies (Dust flux, fine and coarse dust fluxes, winter and summer scores) results were plotted as moving average using 3 data points for the entire data (Fig. 4).

## 2. Tables and figures

Table S1. Selected 17 modern dusty days classified by climate system and source of database.

| Date             | Data Reference | Date             | Data Reference |
|------------------|----------------|------------------|----------------|
| <b>Summer</b>    |                | <b>Winter</b>    |                |
| <b>05-Jul-11</b> | Known Haboob   | <b>09-Feb-12</b> | Improve        |
| <b>18-Aug-11</b> | Improve        | <b>07-Mar-12</b> | Improve        |
| <b>17-Jun-12</b> | Improve        | <b>16-Apr-15</b> | Improve        |
| <b>21-Jul-12</b> | NOAA Data Base | <b>07-Mar-16</b> | Improve        |
| <b>12-Jul-13</b> | NOAA Data Base | <b>23-Mar-16</b> | Improve        |
| <b>13-Jul-14</b> | NOAA Data Base | <b>08-Arp-18</b> | Improve        |
| <b>05-Aug-16</b> | Improve        |                  |                |
| <b>21-Aug-16</b> | NOAA Data Base |                  |                |
| <b>08-Aug-18</b> | NOAA Data Base |                  |                |
| <b>22-Jul-19</b> | NOAA Data Base |                  |                |
| <b>23-Sep-19</b> | NOAA Data Base |                  |                |

Table S2. Radiocarbon samples from MW core

| <i>Current study</i>                   |            |                 |                           |           |           |                             |
|----------------------------------------|------------|-----------------|---------------------------|-----------|-----------|-----------------------------|
| Sample Name                            | Depth [cm] | Material        | Radiocarbon Age [yr. B.P] | δ13 C (%) | δ14 C (‰) | 2σ Calibrated Age [yr. B.P] |
| <b>GT-100</b>                          | 155        | Twig            | 1290 ± 20                 | -         | -148.2    | 1283-1224                   |
| <b>GT-100</b>                          | 155        | Charcoal        | 1410 ± 15                 | -         | -160.7    | 1339-1293                   |
| <b>GT-100</b>                          | 155        | Scirpus seed    | 1260 ± 20                 | -         | -145.3    | 1273-1175                   |
| <b>GT-118**</b>                        | 620        | Twigs           | 30,500 ± 310              | -         | -977.6    | 33,076-31,985               |
| <b>GT-121</b>                          | 757        | Insect wing     | 9780 ± 170                | -         | -704.2    | 11,811-10,665               |
| <b>GT-121**</b>                        | 757        | Twigs           | 29,190 ± 170              | -         | -973.6    | 31,841-31,011               |
| <b>GT-121</b>                          | 757        | Charcoal        | 9490 ± 35                 | -         | -693.1    | 10,814-10,651               |
| <b>GT-126**</b>                        | 942        | Twigs           | 31,930 ± 320              | -         | -981.2    | 34,531-33,145               |
| <i>Davis and Shafer (1992) samples</i> |            |                 |                           |           |           |                             |
| Sample Name                            | Depth [cm] | Material        | Radiocarbon Age [yr. B.P] | δ13 C (%) | δ14 C (‰) | Calibrated Age [yr. B.P]    |
| <b>AA-2450</b>                         | 220-230    | Charcoal, wood  | 1526 ± 50                 | -         | -         | 1527-1327                   |
| <b>AA-2451</b>                         | 325-335    | Charcoal, wood  | 2885 ± 60                 | -         | -         | 3211-2867                   |
| <b>AA-4693</b>                         | 390-400    | Charcoal, wood  | 5540 ± 60                 | -         | -         | 6470-6266                   |
| <b>AA-2452</b>                         | 460-470    | Scirpus achenes | 8003 ± 70                 | -         | -         | 9013-8649                   |
| <b>A-4732**</b>                        | 530-540    | “bark”          | 14,950 +350 – 320         | -26.7     | -         | -                           |
| <b>A-4733</b>                          | 887        | Wood            | 9520 ± 200                | -25.3     | -         | 10,420                      |
| <b>AA-5053**</b>                       | 887        | Wood            | 24,910 ± 370              | -         | -         | -                           |
| <b>AA-4694</b>                         | 1015       | Juniper twig    | 10,975 ± 95               | -         | -         | 12,225                      |

**\*\*Rejected Samples**

Table S3. Major elements analytical parameters

|                                | Al     | Fe   | Ca   |
|--------------------------------|--------|------|------|
| <b>Precision [%]</b>           | 4      | 5    | 3    |
| <b>Accuracy [%]</b>            | 4      | 4    | 7    |
| <b>LOD [mg/l]</b>              | 0.08   | 0.01 | 0.03 |
| <b>Procedural Blank [wt.%]</b> | < 0.08 | 0.01 | 0.07 |

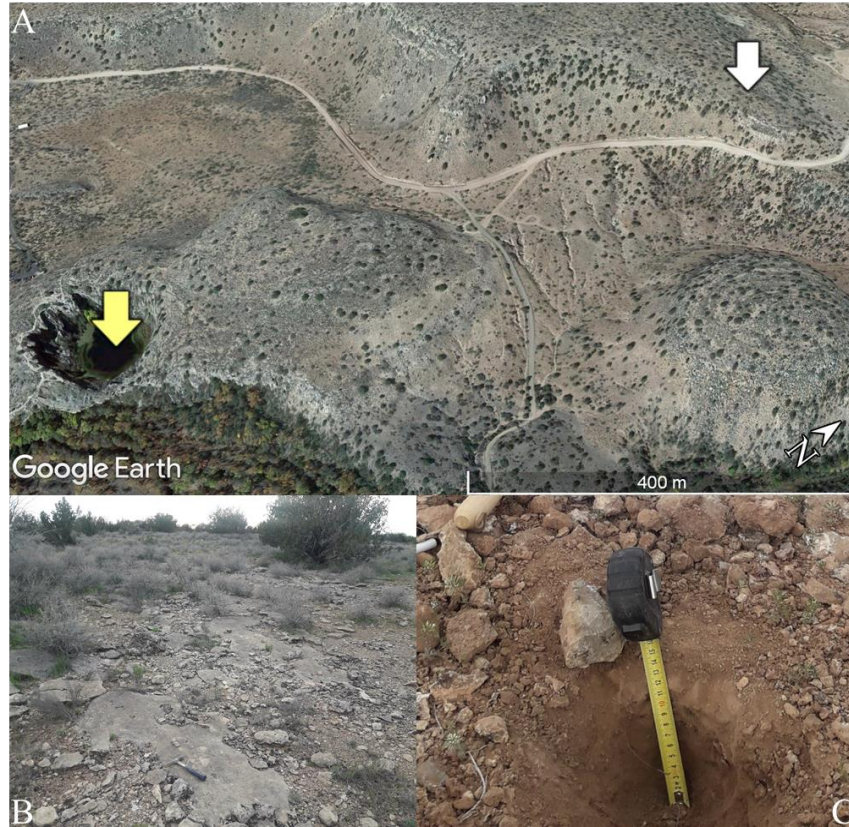

Figure S1. A. Aerial photo (via Google Earth) of soil sampling location on a hilltop adjacent to MW. B. Field photo displaying the soils surface. C. Field photo of soil-2 profile (12 cm), revealing silty clay loam texture.

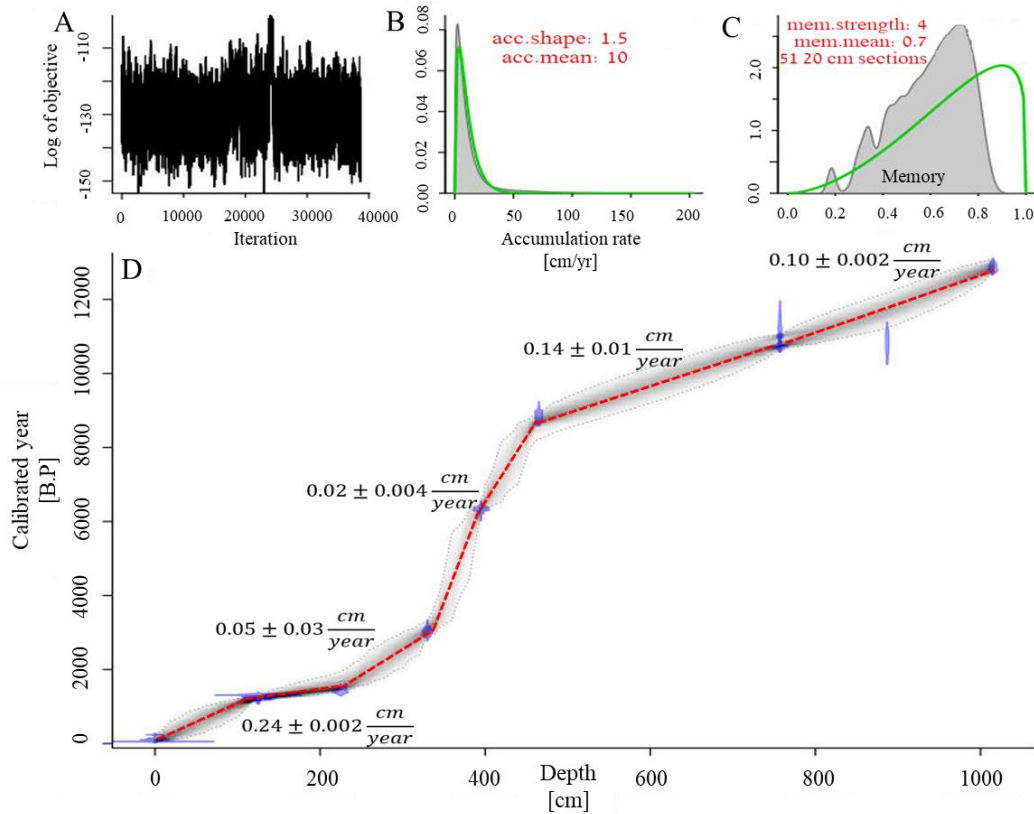

Figure S2. The MW core age-depth model via Bacon software. A. Graph indicates Markov chain Monte Carlo iterations. B, C. prior (green line) and posterior (grey histogram) distributions for the accumulation rate (B) and memory (C). D. Calibrated radiocarbon ages are in blue. Red line specifies the best age-depth model and grey dotted lines show 95% confidence intervals.



Table S4. The MW core properties (MA-moving average)

| Sample   | Depth | Calibrated Age | Accumulation Rate | Density              | Mode | Texture   | Al      | Fe      | Ca      | MA-Winter PSD Score | MA-Summer PSD Score | MA-Winter Chemistry Score | MA-Summer Chemistry Score | Bedrock Flux            | Dust Flux               | MA-Dust Flux            | MA-Fine Dust Flux       |
|----------|-------|----------------|-------------------|----------------------|------|-----------|---------|---------|---------|---------------------|---------------------|---------------------------|---------------------------|-------------------------|-------------------------|-------------------------|-------------------------|
|          | cm    | [ka B.P]       | [cm/yr]           | [g/cm <sup>3</sup> ] | [μm] | -         | [wt. %] | [wt. %] | [wt. %] | [%]                 | [%]                 | [%]                       | [%]                       | [g/cm <sup>2</sup> /yr] | [g/cm <sup>2</sup> /yr] | [g/cm <sup>2</sup> /yr] | [g/cm <sup>2</sup> /yr] |
| MZW -411 | 130   | 1.3            | 0.24              | 0.3                  | 56   | Silt Loam | 1.7     | 0.9     | 2.7     | 11                  | 89                  | 52                        | 48                        | 0.1                     | 0.3                     | 0.2                     | 0.02                    |
| GT-01    | 139   | 1.3            | 0.29              | 0.3                  | n/a  | n/a       | 1.9     | 0.7     | 1.8     | n/a                 | n/a                 | 29                        | 71                        | 0.05                    | 0.4                     | 0.4                     | n/a                     |
| MZW -412 | 146   | 1.3            | 0.29              | 0.3                  | 46   | Silt Loam | 1.8     | 0.7     | 1.9     | 10                  | 90                  | 22                        | 78                        | 0.1                     | 0.4                     | 0.4                     | 0.04                    |
| GT-100   | 155   | 1.3            | 0.30              | n/a                  | 64   | Silt Loam | n/a     | n/a     | n/a     | 7                   | 93                  | n/a                       | n/a                       | n/a                     | n/a                     | 0.4                     | 0.03                    |
| GT-02    | 163   | 1.4            | 0.29              | 0.3                  | n/a  | n/a       | 1.9     | 0.8     | 5.4     | n/a                 | n/a                 | 10                        | 90                        | 0.1                     | 0.3                     | 0.4                     | n/a                     |
| MZW -413 | 170   | 1.4            | 0.29              | 0.3                  | n/a  | n/a       | 1.7     | 0.6     | 5.4     | n/a                 | n/a                 | 11                        | 89                        | 0.1                     | 0.3                     | 0.3                     | n/a                     |
| GT-03    | 176   | 1.4            | 0.33              | 0.3                  | n/a  | n/a       | 1.9     | 0.7     | 7.7     | n/a                 | n/a                 | 9                         | 91                        | 0.2                     | 0.4                     | 0.4                     | n/a                     |
| GT-101   | 178   | 1.4            | 0.29              | n/a                  | 66   | Silt Loam | n/a     | n/a     | n/a     | 11                  | 89                  | n/a                       | n/a                       | n/a                     | n/a                     | 0.4                     | 0.04                    |
| MZW -414 | 186   | 1.4            | 0.30              | 0.3                  | 38   | Silt Loam | 1.8     | 0.70    | 11      | 8                   | 92                  | 7                         | 93                        | 0.3                     | 0.4                     | 0.4                     | 0.03                    |
| GT-102   | 201   | 1.5            | 0.29              | n/a                  | 43   | Silt Loam | n/a     | n/a     | n/a     | 8                   | 92                  | n/a                       | n/a                       | n/a                     | n/a                     | 0.4                     | 0.03                    |
| GT-04    | 218   | 1.6            | 0.15              | 0.3                  | n/a  | n/a       | 0.8     | 0.5     | 23      | n/a                 | n/a                 | n/a                       | n/a                       | 0.3                     | 0.1                     | 0.2                     | n/a                     |
| MZW -415 | 226   | 1.6            | 0.11              | 0.3                  | n/a  | n/a       | 1.7     | 0.9     | 16      | n/a                 | n/a                 | 27                        | 73                        | 0.1                     | 0.1                     | 0.10                    | n/a                     |
| MZW -416 | 245   | 1.8            | 0.07              | 0.2                  | 34   | Silt Loam | 1.0     | 0.6     | 31      | 15                  | 85                  | n/a                       | n/a                       | 0.2                     | 0.04                    | 0.08                    | 0.01                    |
| GT-05    | 253   | 1.9            | 0.07              | 0.2                  | n/a  | n/a       | 0.6     | 0.4     | 15      | n/a                 | n/a                 | n/a                       | n/a                       | 0.1                     | 0.02                    | 0.06                    | n/a                     |
| GT-06    | 261   | 2.0            | 0.07              | 0.4                  | n/a  | n/a       | 1.3     | 0.6     | 19      | n/a                 | n/a                 | n/a                       | n/a                       | 0.2                     | 0.1                     | 0.05                    | n/a                     |
| GT-07    | 284   | 2.3            | 0.07              | 0.6                  | n/a  | n/a       | 0.9     | 0.5     | 29      | n/a                 | n/a                 | n/a                       | n/a                       | 0.4                     | 0.1                     | 0.09                    | n/a                     |
| MZW -418 | 291   | 2.4            | 0.07              | 0.6                  | 33   | Silt Loam | 1.3     | 0.6     | 23      | 23                  | 77                  | n/a                       | n/a                       | 0.3                     | 0.1                     | 0.1                     | 0.02                    |
| GT-08    | 315   | 2.8            | 0.05              | 0.3                  | n/a  | n/a       | 1.3     | 0.6     | 20      | n/a                 | n/a                 | n/a                       | n/a                       | 0.1                     | 0.05                    | 0.09                    | n/a                     |
| MZW -419 | 325   | 3.0            | 0.04              | 0.5                  | 45   | Silt Loam | 1.5     | 0.6     | 18      | 28                  | 72                  | 27                        | 73                        | 0.1                     | 0.1                     | 0.08                    | 0.02                    |
| GT-09    | 339   | 3.3            | 0.02              | 0.7                  | n/a  | n/a       | 0.9     | 0.5     | 28      | n/a                 | n/a                 | n/a                       | n/a                       | 0.1                     | 0.03                    | 0.05                    | n/a                     |
| GT-103   | 343   | 3.5            | 0.02              | 0.6                  | 27   | Silt      | 0.7     | 0.4     | 31      | 14                  | 86                  | n/a                       | n/a                       | 0.1                     | 0.02                    | 0.04                    | 0.01                    |
| GT-10    | 353   | 4.0            | 0.02              | 0.1                  | n/a  | n/a       | 0.6     | 0.6     | 10      | n/a                 | n/a                 | n/a                       | n/a                       | 0.01                    | 0.004                   | 0.02                    | n/a                     |
| MZW -420 | 358   | 4.3            | 0.02              | 0.2                  | 47   | Silt Loam | 0.7     | 0.5     | 16      | 13                  | 87                  | n/a                       | n/a                       | 0.02                    | 0.01                    | 0.008                   | 0.001                   |
| GT-104   | 368   | 4.9            | 0.02              | 0.3                  | 26   | Silt      | 1.1     | 0.7     | 27      | 12                  | 88                  | n/a                       | n/a                       | 0.04                    | 0.01                    | 0.008                   | 0.001                   |
| GT-11    | 376   | 5.3            | 0.02              | 0.4                  | n/a  | n/a       | 3.1     | 1.3     | 10      | n/a                 | n/a                 | 35                        | 65                        | 0.02                    | 0.1                     | 0.02                    | n/a                     |
| MZW -421 | 384   | 5.8            | 0.02              | 0.5                  | 34   | Silt Loam | 2.5     | 1.0     | 15      | 22                  | 78                  | n/a                       | n/a                       | 0.04                    | 0.1                     | 0.04                    | 0.009                   |
| GT-105   | 388   | 6.0            | 0.02              | 0.5                  | 43   | Silt Loam | 1.7     | 0.8     | 6.6     | 21                  | 79                  | 26                        | 74                        | 0.02                    | 0.05                    | 0.05                    | 0.01                    |
| MZW -422 | 410   | 6.9            | 0.03              | 0.8                  | 59   | Silt Loam | 2.6     | 0.9     | 15      | 20                  | 80                  | 31                        | 69                        | 0.1                     | 0.1                     | 0.08                    | 0.02                    |
| GT-12    | 412   | 7.0            | 0.03              | 0.8                  | n/a  | n/a       | 1.0     | 0.5     | 29      | n/a                 | n/a                 | n/a                       | n/a                       | 0.2                     | 0.1                     | 0.08                    | n/a                     |
| GT-106   | 415   | 7.1            | 0.03              | 0.7                  | 41   | Silt Loam | 1.3     | 0.6     | 28      | 22                  | 78                  | n/a                       | n/a                       | 0.2                     | 0.1                     | 0.08                    | 0.02                    |
| GT-107   | 429   | 7.6            | 0.03              | 0.5                  | 25   | Silt Loam | 1.1     | 0.8     | 12      | 29                  | 71                  | 46                        | 54                        | 0.1                     | 0.04                    | 0.05                    | 0.01                    |
| MZW -423 | 440   | 7.9            | 0.03              | 0.4                  | 23   | Silt Loam | n/a     | n/a     | n/a     | 40                  | 60                  | 48                        | 52                        | n/a                     | n/a                     | 0.05                    | 0.02                    |
| GT-13    | 443   | 8.0            | 0.03              | 0.3                  | n/a  | n/a       | 1.8     | 1.0     | 12      | n/a                 | n/a                 | 67                        | 33                        | 0.03                    | 0.04                    | 0.04                    | n/a                     |
| GT-108   | 450   | 8.3            | 0.05              | 0.3                  | 28   | Silt Loam | 0.8     | 0.4     | 20      | 39                  | 61                  | n/a                       | n/a                       | 0.1                     | 0.03                    | 0.03                    | 0.01                    |
| MZW -424 | 472   | 8.7            | 0.11              | 0.3                  | 28   | Silt      | 1.2     | 0.6     | 22      | 32                  | 68                  | n/a                       | n/a                       | 0.2                     | 0.1                     | 0.05                    | 0.02                    |
| GT-109   | 481   | 8.8            | 0.14              | n/a                  | 36   | Silt Loam | n/a     | n/a     | n/a     | 33                  | 67                  | n/a                       | n/a                       | n/a                     | n/a                     | 0.06                    | 0.02                    |
| GT-14    | 490   | 8.9            | 0.14              | 0.3                  | n/a  | n/a       | 1.0     | 0.6     | 12      | n/a                 | n/a                 | 67                        | 33                        | 0.1                     | 0.1                     | 0.08                    | n/a                     |
| MZW -425 | 497   | 8.9            | 0.14              | 0.3                  | 39   | Silt Loam | 0.7     | 0.4     | 20      | 25                  | 75                  | n/a                       | n/a                       | 0.2                     | 0.1                     | 0.07                    | 0.02                    |
| GT-110   | 504   | 9.0            | 0.14              | n/a                  | 32   | Silt Loam | n/a     | n/a     | n/a     | 27                  | 73                  | n/a                       | n/a                       | n/a                     | n/a                     | 0.07                    | 0.02                    |
| GT-15    | 508   | 9.0            | 0.14              | 0.3                  | n/a  | n/a       | 1.2     | 0.5     | 12      | n/a                 | n/a                 | 53                        | 47                        | 0.1                     | 0.1                     | 0.09                    | n/a                     |
| GT-111   | 515   | 9.1            | 0.14              | n/a                  | 19   | Silt Loam | n/a     | n/a     | n/a     | 32                  | 68                  | n/a                       | n/a                       | n/a                     | n/a                     | 0.1                     | 0.03                    |

| Sample   | Depth | Calibrated Age | Accumulation Rate | Density              | Mode | Texture   | Al      | Fe      | Ca      | MA-Winter PSD Score | MA-Summer PSD Score | MA-Winter Chemistry Score | MA-Summer Chemistry Score | Bedrock Flux            | Dust Flux               | MA-Dust Flux            | MA-Fine Dust Flux       |
|----------|-------|----------------|-------------------|----------------------|------|-----------|---------|---------|---------|---------------------|---------------------|---------------------------|---------------------------|-------------------------|-------------------------|-------------------------|-------------------------|
|          | cm    | [ka B.P]       | [cm/yr]           | [g/cm <sup>3</sup> ] | [μm] | -         | [wt. %] | [wt. %] | [wt. %] | [%]                 | [%]                 | [%]                       | [%]                       | [g/cm <sup>2</sup> /yr] | [g/cm <sup>2</sup> /yr] | [g/cm <sup>2</sup> /yr] | [g/cm <sup>2</sup> /yr] |
| MZW -426 | 526   | 9.2            | 0.14              | 0.4                  | 11   | Silt Loam | 3.0     | 1.3     | 2.0     | 58                  | 42                  | 36                        | 64                        | 0.03                    | 0.3                     | 0.2                     | 0.1                     |
| GT-16    | 534   | 9.2            | 0.14              | 0.4                  | n/a  | n/a       | 1.6     | 1.0     | 16      | n/a                 | n/a                 | 36                        | 64                        | 0.3                     | 0.2                     | 0.3                     | n/a                     |
| GT-112   | 540   | 9.3            | 0.14              | n/a                  | 43   | Silt Loam | n/a     | n/a     | n/a     | 53                  | 47                  | n/a                       | n/a                       | n/a                     | n/a                     | 0.3                     | 0.1                     |
| GT-113   | 555   | 9.4            | 0.14              | n/a                  | 40   | Silt Loam | n/a     | n/a     | n/a     | 43                  | 57                  | n/a                       | n/a                       | n/a                     | n/a                     | 0.2                     | 0.1                     |
| GT-17    | 556   | 9.4            | 0.14              | 0.5                  | n/a  | n/a       | 1.0     | 1.3     | 20      | n/a                 | n/a                 | n/a                       | n/a                       | 0.4                     | 0.1                     | 0.1                     | n/a                     |
| MZW -427 | 562   | 9.4            | 0.14              | 0.4                  | 28   | Silt Loam | 2.1     | 1.1     | 18      | 20                  | 80                  | 56                        | 44                        | 0.3                     | 0.3                     | 0.2                     | 0.04                    |
| GT-114   | 571   | 9.5            | 0.14              | n/a                  | 41   | Silt Loam | n/a     | n/a     | n/a     | 29                  | 71                  | n/a                       | n/a                       | n/a                     | n/a                     | 0.2                     | 0.1                     |
| GT-18    | 578   | 9.5            | 0.14              | 0.4                  | n/a  | n/a       | 0.9     | 0.7     | 14      | n/a                 | n/a                 | n/a                       | n/a                       | 0.2                     | 0.1                     | 0.2                     | n/a                     |
| GT-115   | 583   | 9.6            | 0.14              | n/a                  | 43   | Silt Loam | n/a     | n/a     | n/a     | 25                  | 75                  | n/a                       | n/a                       | n/a                     | n/a                     | 0.1                     | 0.03                    |
| GT-116   | 595   | 9.7            | 0.14              | n/a                  | 54   | Silt Loam | n/a     | n/a     | n/a     | 25                  | 75                  | n/a                       | n/a                       | n/a                     | n/a                     | 0.1                     | 0.03                    |
| GT-19    | 605   | 9.7            | 0.14              | 0.3                  | n/a  | n/a       | 1.4     | 0.8     | 9.6     | n/a                 | n/a                 | 72                        | 28                        | 0.1                     | 0.1                     | 0.1                     | n/a                     |
| GT-117   | 608   | 9.7            | 0.14              | n/a                  | 30   | Silt Loam | n/a     | n/a     | n/a     | 23                  | 77                  | n/a                       | n/a                       | n/a                     | n/a                     | 0.1                     | 0.03                    |
| GT-20    | 616   | 9.8            | 0.14              | 0.3                  | n/a  | n/a       | 2.0     | 1.1     | 4.1     | n/a                 | n/a                 | 70                        | 30                        | 0.1                     | 0.2                     | 0.2                     | n/a                     |
| GT-118   | 620   | 9.8            | 0.14              | n/a                  | 35   | Silt Loam | n/a     | n/a     | n/a     | 25                  | 75                  | n/a                       | n/a                       | n/a                     | n/a                     | 0.2                     | 0.04                    |
| GT-119   | 688   | 10.3           | 0.14              | n/a                  | 38   | Silt Loam | n/a     | n/a     | n/a     | 24                  | 76                  | n/a                       | n/a                       | n/a                     | n/a                     | 0.2                     | 0.04                    |
| GT-21    | 698   | 10.4           | 0.14              | 0.3                  | n/a  | n/a       | 1.8     | 0.9     | 9.6     | n/a                 | n/a                 | 66                        | 34                        | 0.1                     | 0.2                     | 0.2                     | n/a                     |
| MZW -428 | 709   | 10.5           | 0.14              | 0.3                  | 44   | Silt Loam | n/a     | n/a     | n/a     | 18                  | 82                  | 68                        | 32                        | n/a                     | n/a                     | 0.2                     | 0.03                    |
| GT-120   | 716   | 10.5           | 0.14              | n/a                  | 36   | Silt Loam | n/a     | n/a     | n/a     | 12                  | 88                  | n/a                       | n/a                       | n/a                     | n/a                     | 0.2                     | 0.02                    |
| GT-22    | 726   | 10.6           | 0.14              | 0.4                  | n/a  | n/a       | 1.5     | 1.0     | 2.7     | n/a                 | n/a                 | 70                        | 30                        | 0.04                    | 0.2                     | 0.2                     | n/a                     |
| MZW -429 | 742   | 10.7           | 0.14              | 0.3                  | 12   | Silt Loam | 2.2     | 0.9     | 1.9     | 38                  | 62                  | 57                        | 43                        | 0.02                    | 0.2                     | 0.2                     | 0.1                     |
| GT-23    | 751   | 10.8           | 0.14              | 0.2                  | n/a  | n/a       | 1.5     | 0.6     | 1.5     | n/a                 | n/a                 | 36                        | 64                        | 0.01                    | 0.1                     | 0.2                     | n/a                     |
| GT-121   | 757   | 10.8           | 0.15              | n/a                  | 32   | Silt Loam | n/a     | n/a     | n/a     | 42                  | 58                  | n/a                       | n/a                       | n/a                     | n/a                     | 0.2                     | 0.1                     |
| GT-122   | 786   | 11.0           | 0.15              | n/a                  | 20   | Silt Loam | n/a     | n/a     | n/a     | 59                  | 41                  | n/a                       | n/a                       | n/a                     | n/a                     | 0.1                     | 0.1                     |
| GT-24    | 797   | 11.1           | 0.14              | 0.3                  | n/a  | n/a       | 3.0     | 1.1     | 1.2     | n/a                 | n/a                 | 15                        | 85                        | 0.02                    | 0.3                     | 0.3                     | n/a                     |
| MZW -430 | 808   | 11.2           | 0.15              | 0.4                  | 23   | Silt Loam | 2.7     | 0.9     | 1.8     | 50                  | 50                  | 18                        | 82                        | 0.03                    | 0.3                     | 0.3                     | 0.2                     |
| GT-123   | 827   | 11.3           | 0.15              | n/a                  | 21   | Silt Loam | n/a     | n/a     | n/a     | 60                  | 40                  | n/a                       | n/a                       | n/a                     | n/a                     | 0.3                     | 0.2                     |
| GT-25    | 836   | 11.4           | 0.14              | 0.5                  | n/a  | n/a       | 3.4     | 1.1     | 1.7     | n/a                 | n/a                 | 20                        | 80                        | 0.03                    | 0.5                     | 0.4                     | n/a                     |
| MZW -431 | 848   | 11.5           | 0.14              | 0.5                  | 13   | Silt Loam | 2.8     | 0.9     | 1.7     | 64                  | 36                  | 24                        | 76                        | 0.04                    | 0.5                     | 0.5                     | 0.3                     |
| GT-26    | 859   | 11.5           | 0.15              | 0.6                  | n/a  | n/a       | 3.3     | 1.2     | 1.8     | n/a                 | n/a                 | 20                        | 80                        | 0.05                    | 0.6                     | 0.6                     | n/a                     |
| GT-124   | 867   | 11.6           | 0.13              | n/a                  | 24   | Silt Loam | n/a     | n/a     | n/a     | 61                  | 39                  | n/a                       | n/a                       | n/a                     | n/a                     | 0.6                     | 0.3                     |
| GT-27    | 905   | 11.9           | 0.11              | 0.6                  | n/a  | n/a       | 3.1     | 1.1     | 3.6     | n/a                 | n/a                 | 18                        | 82                        | 0.07                    | 0.5                     | 0.5                     | n/a                     |
| MZW -432 | 924   | 12.0           | 0.11              | 0.5                  | 22   | Silt Loam | 2.9     | 1.1     | 3.3     | 60                  | 40                  | 15                        | 85                        | 0.05                    | 0.4                     | 0.4                     | 0.2                     |
| GT-28    | 933   | 12.1           | 0.11              | 0.5                  | n/a  | n/a       | 3.0     | 1.3     | 3.5     | n/a                 | n/a                 | 20                        | 80                        | 0.05                    | 0.3                     | 0.4                     | n/a                     |
| GT-126   | 942   | 12.2           | 0.11              | n/a                  | 62   | Silt Loam | n/a     | n/a     | n/a     | 45                  | 55                  | n/a                       | n/a                       | n/a                     | n/a                     | 0.3                     | 0.2                     |
| GT-127   | 960   | 12.4           | 0.11              | n/a                  | 41   | Silt Loam | n/a     | n/a     | n/a     | 30                  | 70                  | n/a                       | n/a                       | n/a                     | n/a                     | 0.3                     | 0.1                     |
| GT-29    | 969   | 12.5           | 0.11              | 0.4                  | n/a  | n/a       | 2.2     | 0.8     | 5.0     | n/a                 | n/a                 | 16                        | 84                        | 0.06                    | 0.2                     | 0.2                     | n/a                     |
| GT-128   | 977   | 12.5           | 0.11              | n/a                  | 45   | Silt Loam | n/a     | n/a     | n/a     | 23                  | 77                  | n/a                       | n/a                       | n/a                     | n/a                     | 0.2                     | 0.05                    |
| MZW -433 | 997   | 12.7           | 0.11              | 0.5                  | 16   | Silt Loam | 2.0     | 0.8     | 4.2     | 38                  | 62                  | 13                        | 87                        | 0.06                    | 0.2                     | 0.2                     | 0.1                     |
| GT-30    | 998   | 12.7           | 0.11              | 0.5                  | n/a  | n/a       | 2.3     | 0.8     | 5.0     | n/a                 | n/a                 | 3                         | 97                        | 0.07                    | 0.3                     | 0.2                     | n/a                     |
| GT-31    | 1019  | 12.9           | 0.10              | 0.5                  | n/a  | n/a       | 3.2     | 1.1     | 3.6     | n/a                 | n/a                 | 9                         | 91                        | 0.05                    | 0.3                     | 0.3                     | n/a                     |
| GT-129   | 1024  | 13.0           | 0.11              | n/a                  | 52   | Silt Loam | n/a     | n/a     | n/a     | 48                  | 52                  | n/a                       | n/a                       | n/a                     | n/a                     | 0.3                     | 0.1                     |

Table S5. Local bedrock and soil sampling location and properties

| Sample        |                | Location                                      | Mode | Texture         | Al      | Fe      | Ca      | >2mm | <2mm |
|---------------|----------------|-----------------------------------------------|------|-----------------|---------|---------|---------|------|------|
| Type          | name           |                                               | μm   | -               | [wt. %] | [wt. %] | [wt. %] | [%]  | [%]  |
| Local Bedrock | MW-05 A        | Rock fragments<br>from the well<br>escarpment | 0.10 |                 |         |         |         | 37   |      |
|               | MW-05 B        |                                               | 0.19 |                 |         |         |         | 35   |      |
|               | MW-06 A        |                                               | 0.03 |                 |         |         |         | 36   |      |
|               | MW-06 B        |                                               | 0.12 |                 |         |         |         | 36   |      |
|               | MW-07 A        |                                               | 0.08 |                 |         |         |         | 36   |      |
|               | MW-07 B        |                                               | 0.07 |                 |         |         |         | 36   |      |
|               | MW-09 A        |                                               | 0.14 |                 |         |         |         | 36   |      |
|               | MW-09 B        |                                               | 0.11 |                 |         |         |         | 36   |      |
|               | MW-10 A        |                                               | 0.43 |                 |         |         |         | 34   |      |
|               | MW-10 B        |                                               | 0.52 |                 |         |         |         | 34   |      |
|               | MW-11 A        |                                               | 1.4  |                 |         |         |         | 29   |      |
|               | MW-11 B        |                                               | 1.5  |                 |         |         |         | 28   |      |
|               | Bedrock        |                                               | 1.2  |                 |         |         |         | 33   |      |
| Soil          | 1-a (0-0.5 cm) | Adjacent<br>Escarpment                        | 32   | Silt Loam       | 2.2     | 1.1     | 26      | 9    | 91   |
|               | 1-b (0.5-3 cm) |                                               | 29   | Silt Loam       | 3.8     | 2.0     | 18      | 10   | 90   |
|               | 1-c (3-6 cm)   |                                               | 30   | Silt Loam       | 2.3     | 1.3     | 27      | 12   | 88   |
|               | 2-a (0-3 cm)   |                                               | 39   | Silty Clay Loam | 4.4     | 2.7     | 12      | 9    | 91   |
|               | 2-b (3-8 cm)   |                                               | 6    | Silty Clay      | 3.8     | 2.2     | 16      | 16   | 84   |
|               | 2-c (8-12 cm)  |                                               | 8    | Silty Clay Loam | 4.1     | 2.3     | 15      | 9    | 91   |

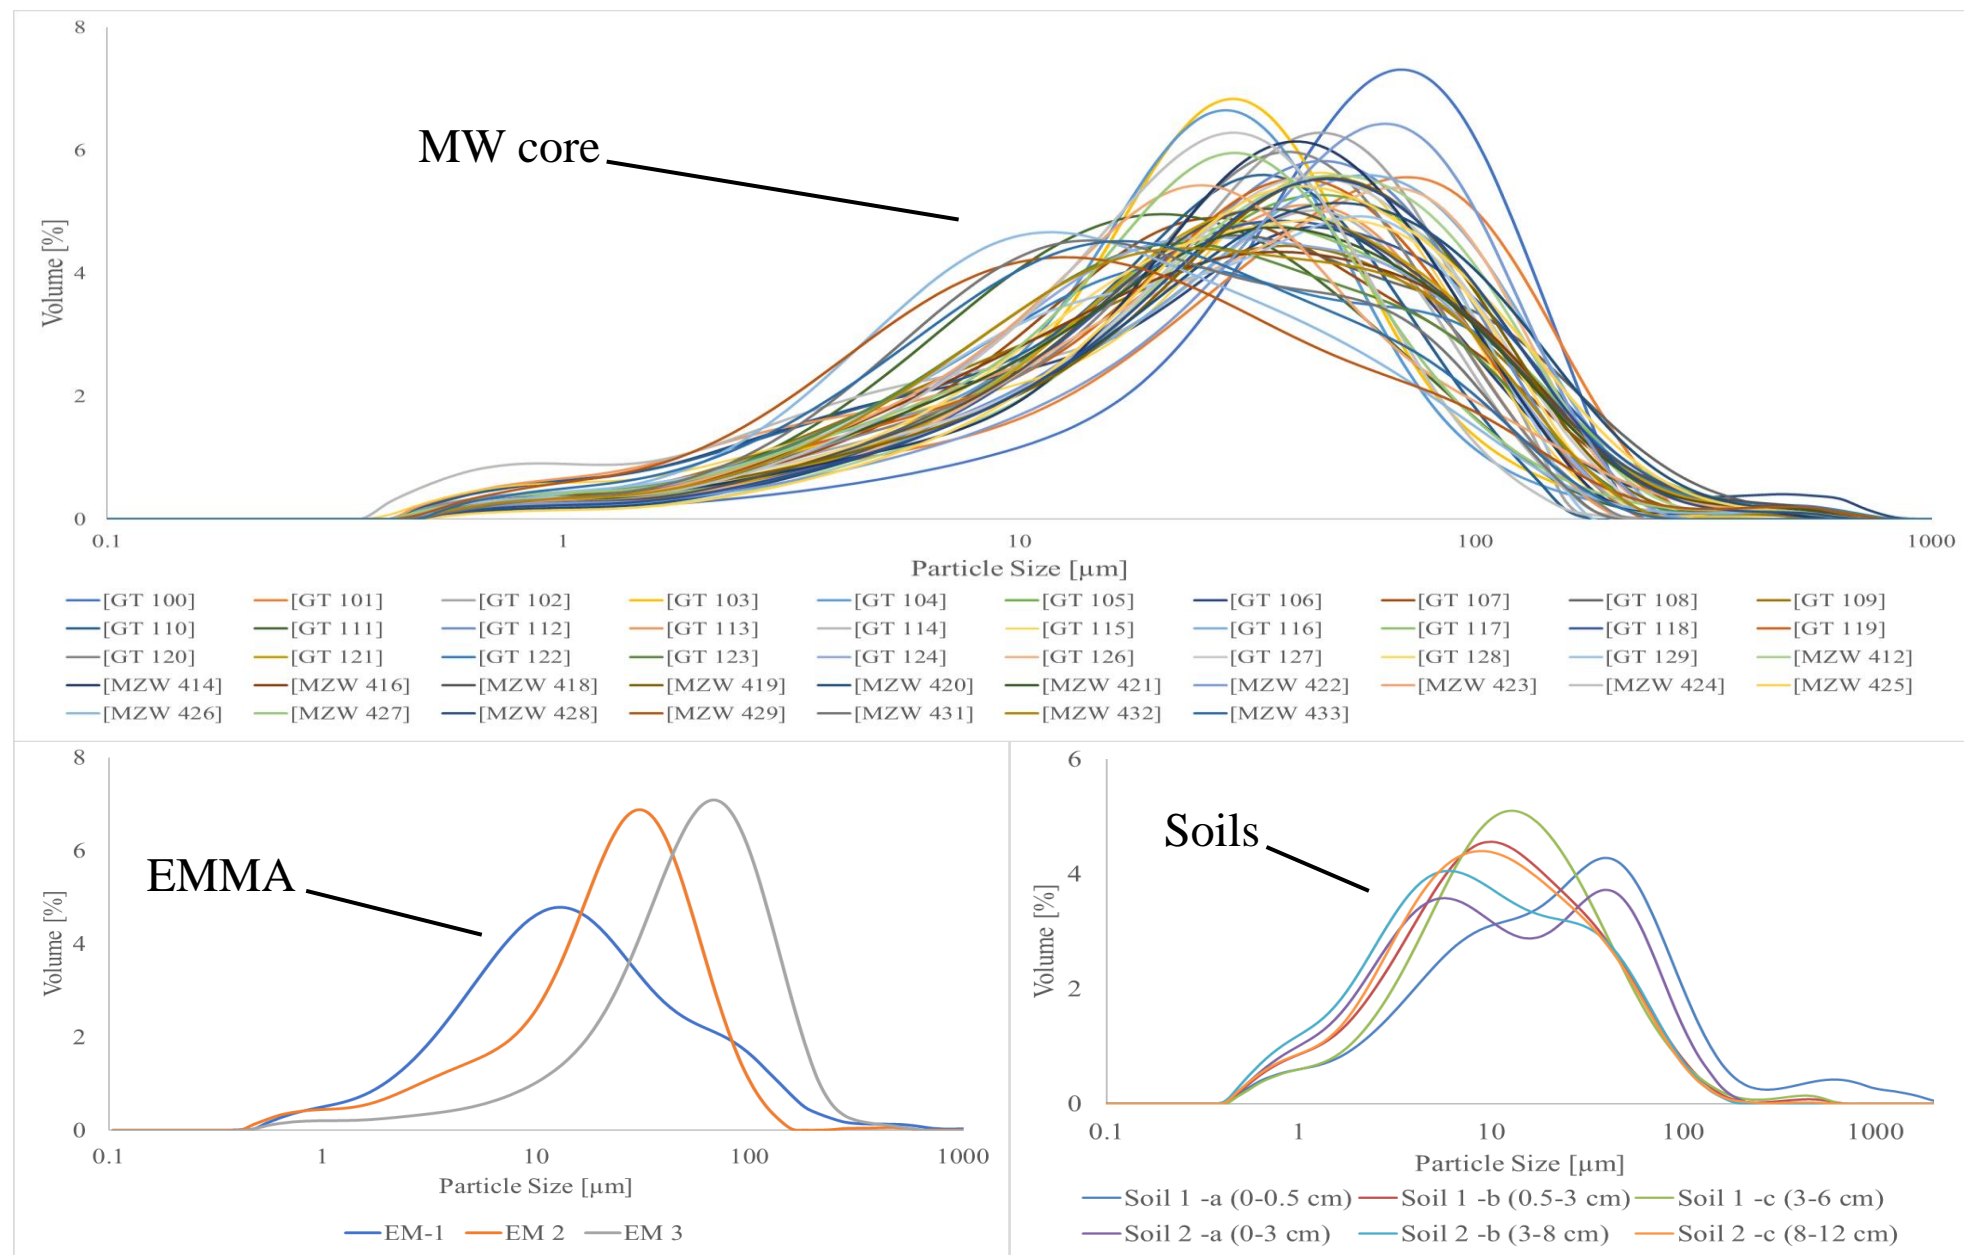

Figure S3. The MW core , EM's and adjacent soils full PSD

| Sample               | Geomorphic Type                           | Distance From MW | Mode | Texture         | Vegetation | Pavement Cover | Longitude               | Latitude         | Al      | Fe      | Ca      |
|----------------------|-------------------------------------------|------------------|------|-----------------|------------|----------------|-------------------------|------------------|---------|---------|---------|
|                      | -                                         | Km               | µm   | -               | %          | %              | Degrees minutes seconds |                  | [wt. %] | [wt. %] | [wt. %] |
| Summer -Alluvial Fan |                                           |                  |      |                 |            |                |                         |                  |         |         |         |
| MB-02                | Wash Bank                                 | 185              | 82   | Sandy Loam      | 30         | 0              | 33° 2' 33.4" N          | 112° 18' 8.3" W  | 6.4     | 2.4     | 1.2     |
| MB-03                | Terrace Bank                              | 185              | 56   | Loam            | 0          | 0              | 33° 2' 33.4" N          | 112° 18' 8.3" W  | 6.7     | 2.6     | 1.6     |
| MB-06                | Terrace                                   | 185              | 68   | Loam            | 20-40      | 0-20           | 33° 2' 24.5" N          | 112° 17' 48.1" W | 6.4     | 2.3     | 1.3     |
| MB-07                | Terrace                                   | 185              | 78   | Sandy Loam      | 20-40      | 0-20           | 33° 2' 39.6" N          | 112° 17' 43.7" W | 6.3     | 2.2     | 1.1     |
| CE-01                | Terrace                                   | 190              | 74   | Silt Loam       | 40-50      | 0              | 33° 37' 26.6" N         | 113° 22' 6.0" W  | 6.5     | 3.0     | 2.5     |
| WL-03                | Wash Bank                                 | 320              | 97   | Sandy Loam      | 0          | 0              | 32° 37' 9.9" N          | 114° 8' 50.2" W  | 6.0     | 2.2     | 2.7     |
| WL-05                | Terrace                                   | 320              | 105  | Loam Sand       | 30         | 30             | 32° 37' 10.1" N         | 114° 7' 31.5" W  |         |         |         |
| TC-01                | Terrace                                   | 300              | 112  | Sandy Loam      | 5-10       | 20             | 32° 39' 49.1" N         | 113° 54' 18.3" W | 5.6     | 1.7     | 2.1     |
| GR-01                | Wash                                      | 280              | 151  | Loamy Sand      | 5          | 0              | 32° 49' 55.6" N         | 113° 45' 40.1" W | 6.3     | 1.8     | 2.0     |
| GR-02                | Terrace                                   | 280              | 82   | Sandy Loam      | 5          | 0              | 32° 49' 55.6" N         | 113° 45' 40.1" W | 5.6     | 2.1     | 2.5     |
| GR-03                | Terrace                                   | 280              | 43   | Silt Loam       | 0          | 0              | 32° 49' 57.2" N         | 113° 45' 36.0" W | 6.2     | 2.5     | 4.7     |
| HY-01                | Wash                                      | 240              | 76   | Loam            | 30         | 0              | 33° 0' 7.0" N           | 113° 23' 5.8" W  | 6.8     | 2.0     | 3.1     |
| PD-02                | Terrace                                   | 250              | 75   | Loam            | 30         | 30             | 32° 34' 56.6" N         | 112° 52' 26.3" W | 5.7     | 2.4     | 1.8     |
| GB-02                | Terrace                                   | 205              | 73   | Loam            | 20-30      | 10             | 32° 57' 54.0" N         | 112° 42' 9.8" W  | 6.8     | 2.8     | 2.1     |
| GB-04                | Terrace                                   | 205              | 66   | Loam            | 20-30      | 30             | 32° 58' 12.8" N         | 112° 41' 20.9" W | 5.5     | 2.8     | 2.9     |
| AZ-02                | Terrace                                   | 185              | 64   | Loan            | 30-40      | 10             | 33° 11' 20.9" N         | 112° 42' 6.0" W  | 5.7     | 2.2     | 2.7     |
| CGD-01               | Agriculture Field                         | 180              | 51   | Loam            | n/a        | n/a            | 33° 7' 14.1" N          | 112° 0' 31.1" W  | 6.0     | 2.4     | 1.2     |
| CGD-02               | Agriculture Field                         | 180              | 43   | Silt Loam       | n/a        | n/a            | 32° 46' 41.5" N         | 111° 37' 49.8" W | n/a     | n/a     | n/a     |
| CGD-03               | Agriculture Field                         | 180              | 76   | Loam            | n/a        | n/a            | 32° 46' 13.3" N         | 111° 23' 1.0" W  | n/a     | n/a     | n/a     |
| CGD-04               | Agriculture Field                         | 180              | 57   | Loam            | n/a        | n/a            | 32° 40' 48.6" N         | 111° 28' 19.6" W | n/a     | n/a     | n/a     |
| Summer –Wash         |                                           |                  |      |                 |            |                |                         |                  |         |         |         |
| UT-03                | Fine and wide wash                        | 225              | 55   | Silt Loam       | 0-20       | 0              | 33° 48' 7.8" N          | 113° 55' 29.2" W | 6.7     | 3.0     | 3.0     |
| UT-04                | Fine and wide wash adjacent to vegetation | 225              | 65   | Loam            | 20-30      | 0              | 33° 48' 8.6" N          | 113° 55' 28.7" W | 6.5     | 2.6     | 3.2     |
| UT-05                | Fine and wide wash                        | 225              | 20   | Silty Clay Loam | 0-20       | 0              | 33° 48' 12.4" N         | 113° 55' 31.1" W | 7.4     | 3.3     | 3.7     |
| NH-01                | Fine and wide wash                        | 220              | 41   | Silt Loam       | 0-20       | 10-30          | 33° 37' 8.9" N          | 113° 46' 35.9" W | 6.6     | 2.9     | 4.4     |
| NH-02                | Fine and wide wash                        | 220              | 51   | Silt Loam       | 0-20       | 10-30          | 33° 37' 7.2" N          | 113° 46' 40.7" W | 6.1     | 2.7     | 3.9     |
| CE-03                | Fine and wide wash                        | 190              | 7    | Silty Clay Loam | 0-20       | 0              | 33° 36' 59.3" N         | 113° 25' 33.7" W | 7.9     | 3.7     | 3.0     |
| CE-04                | Fine and wide wash adjacent to vegetation | 190              | 9    | Silty Clay Loam | 20-30      | 0              | 33° 36' 59.3" N         | 113° 25' 33.7" W | n/a     | n/a     | n/a     |
| Summer -Flood Plain  |                                           |                  |      |                 |            |                |                         |                  |         |         |         |
| PL-01                | Gila flood plain                          | 250              | 74   | Loam            | 10-20      | 0              | 32° 54' 36.0" N         | 113° 32' 31.9" W | 5.9     | 2.4     | 3.1     |
| PL-02                | Gila flood plain                          | 250              | 85   | Sandy Loam      | 10-20      | 0              | 32° 54' 36.0" N         | 113° 32' 31.9" W | 5.8     | 2.1     | 2.7     |
| PL-04                | Gila flood plain                          | 250              | 27   | Silt Loam       | 10-20      | 0              | 32° 51' 45.2" N         | 113° 32' 31.1" W | 6.7     | 3.5     | 5.1     |
| GB-03                | Flood plain adjacent to current stream    | 205              | 53   | Silt Loam       | 10-30      | 0              | 32° 59' 39.7" N         | 112° 42' 48.1" W | 7.0     | 3.6     | 4.2     |
| GR-04                | Agriculture Gila flood plain              | 280              | 68   | Sandy Clay      | 0          | 0              | 32° 50' 23.4" N         | 113° 43' 49.4" W | 5.6     | 1.8     | 2.0     |

Table S7. Winter dust sources sampling location and properties

| Sample             | Geomorphic Type                        | Distance From<br>MW | Mode | Texture            | Vegetation | Pavement Cover | Longitude               | Latitude         | Al      | Fe      | Ca      |
|--------------------|----------------------------------------|---------------------|------|--------------------|------------|----------------|-------------------------|------------------|---------|---------|---------|
|                    | -                                      | Km                  | μm   | -                  | %          | %              | Degrees minutes seconds |                  | [wt. %] | [wt. %] | [wt. %] |
| Winter-Playa       |                                        |                     |      |                    |            |                |                         |                  |         |         |         |
| KG-01              | Playa                                  | 245                 | n/a  | n/a                | 0          | 0              | 35° 40' 19.0" N         | 114° 6' 43.6" W  | 7.1     | 4.2     | 5.8     |
| KG-02              | Playa                                  | 245                 | 3    | Silty Clay         | 0          | 0              | 35° 40' 18.0" N         | 114° 6' 38.4" W  | 7.1     | 3.9     | 5.5     |
| KG-03              | Playa Sample adjacent to<br>vegetation | 245                 | 16   | Silty Clay         | 30         | 0              | 35° 40' 24.4" N         | 114° 6' 36.0" W  | 6.6     | 3.7     | 6.5     |
| KG-04              | Wash                                   | 230                 | 11   | Silty Clay<br>Loam | 0-30       | 0              | 35° 34' 54.5" N         | 114° 3' 5.1" W   | 7.2     | 4.0     | 3.5     |
| KG-05              | Wash adjacent to vegetation            | 230                 | 6    | Silty Clay<br>Loam | 0-30       | 0              | 35° 34' 54.5" N         | 114° 3' 5.1" W   | n/a     | n/a     | n/a     |
| KG-06              | Terrace                                | 230                 | 43   | Silt Loam          | 10-30      | 10-20          | 35° 34' 30.0" N         | 114° 3' 35.2" W  | n/a     | n/a     | n/a     |
| KG-07              | Terrace                                | 230                 | n/a  | n/a                | 10-30      | 10-20          | 35° 34' 30.0" N         | 114° 3' 35.2" W  | 3.8     | 1.7     | 7.3     |
| Winter-Flood Plain |                                        |                     |      |                    |            |                |                         |                  |         |         |         |
| BH-07              | Colorado River Flood Plain             | 270                 | 43   | Silt Loam          | 10-20      | 0              | 35° 0' 53.0" N          | 114° 38' 55.9" W | 4.0     | 1.5     | 4.6     |
| BH-08              | Colorado River Flood Plain             | 270                 | 6    | Clay Loam          | 10-20      | 0              | 34° 58' 58.8" N         | 114° 39' 54.9" W | 7.6     | 3.2     | 5.1     |



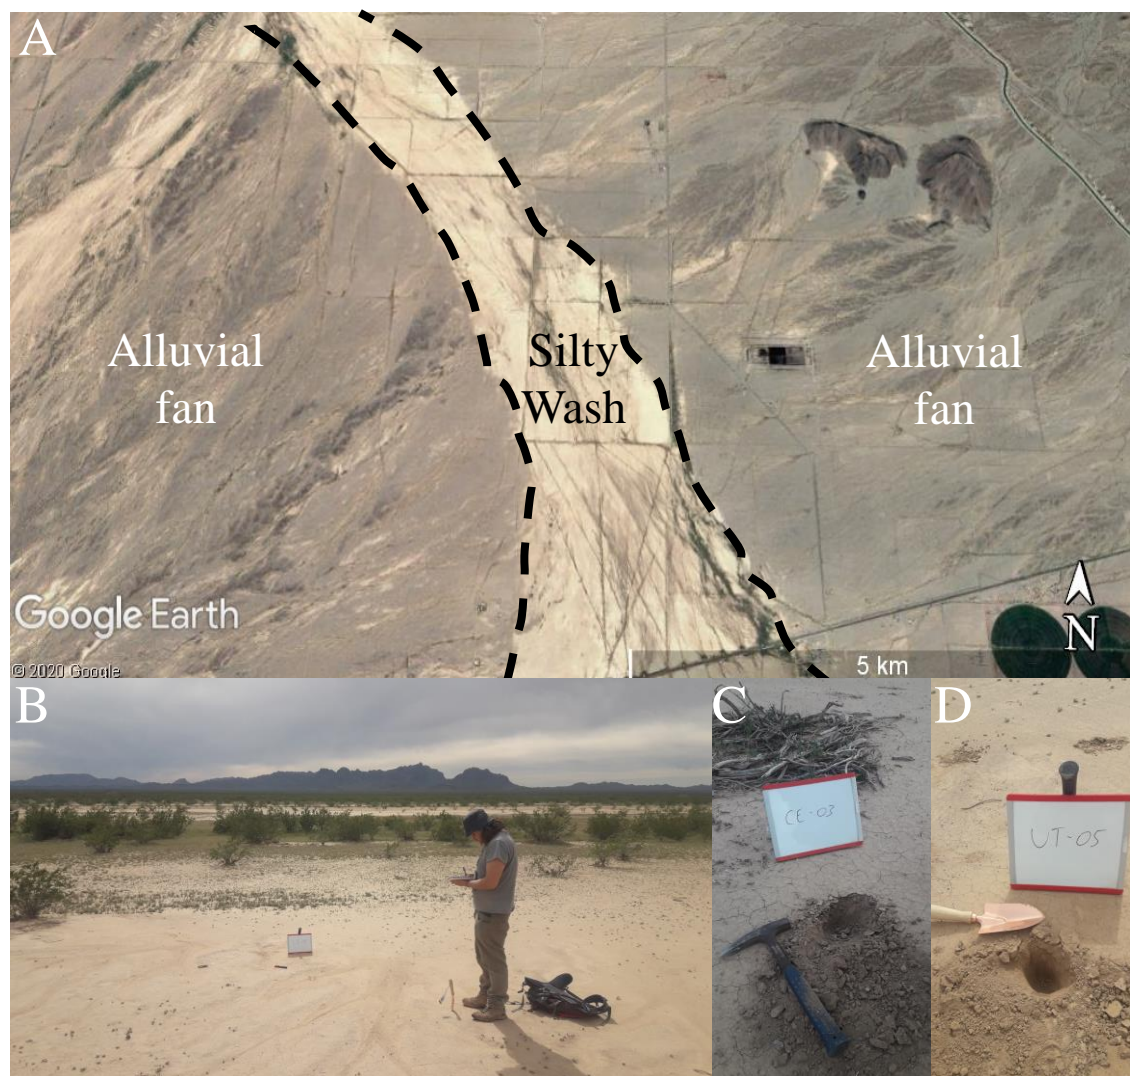

Figure S4. A. Aerial photo (via Google Earth) of Utting wash (UT) and adjacent alluvial fans; B. Field photo of Utting wash, note the limited coverage of gravels and vegetation; C. and D. A 5 cm pit at Utting (UT) and Centennial (CE) washes revealing silt loam to silty clay loam sediments.

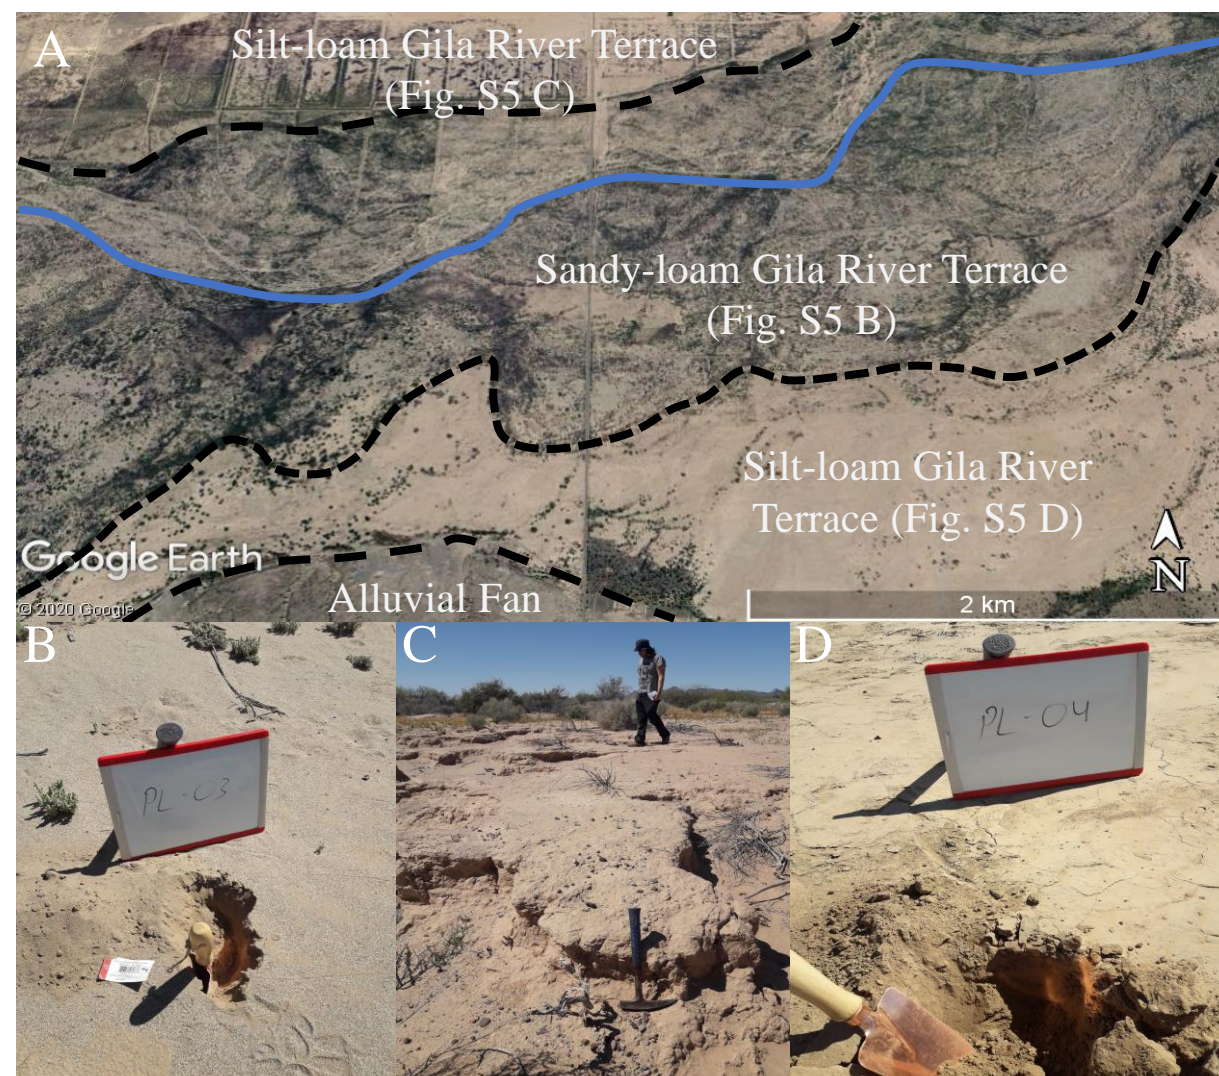

Figure S5. A. Aerial photo (via Google Earth) of Gila River flood plains. Gila River is marked in blue, the active, lower floodplains are adjacent to the river, whereas two elevated terraces appear farther away from the active floodplains; B. A 5 cm pit at the lower floodplain reveals coarse sand sediments; C. and D. The elevated terraces exhibit loam texture sediments and bare surfaces, mostly free of gravel.



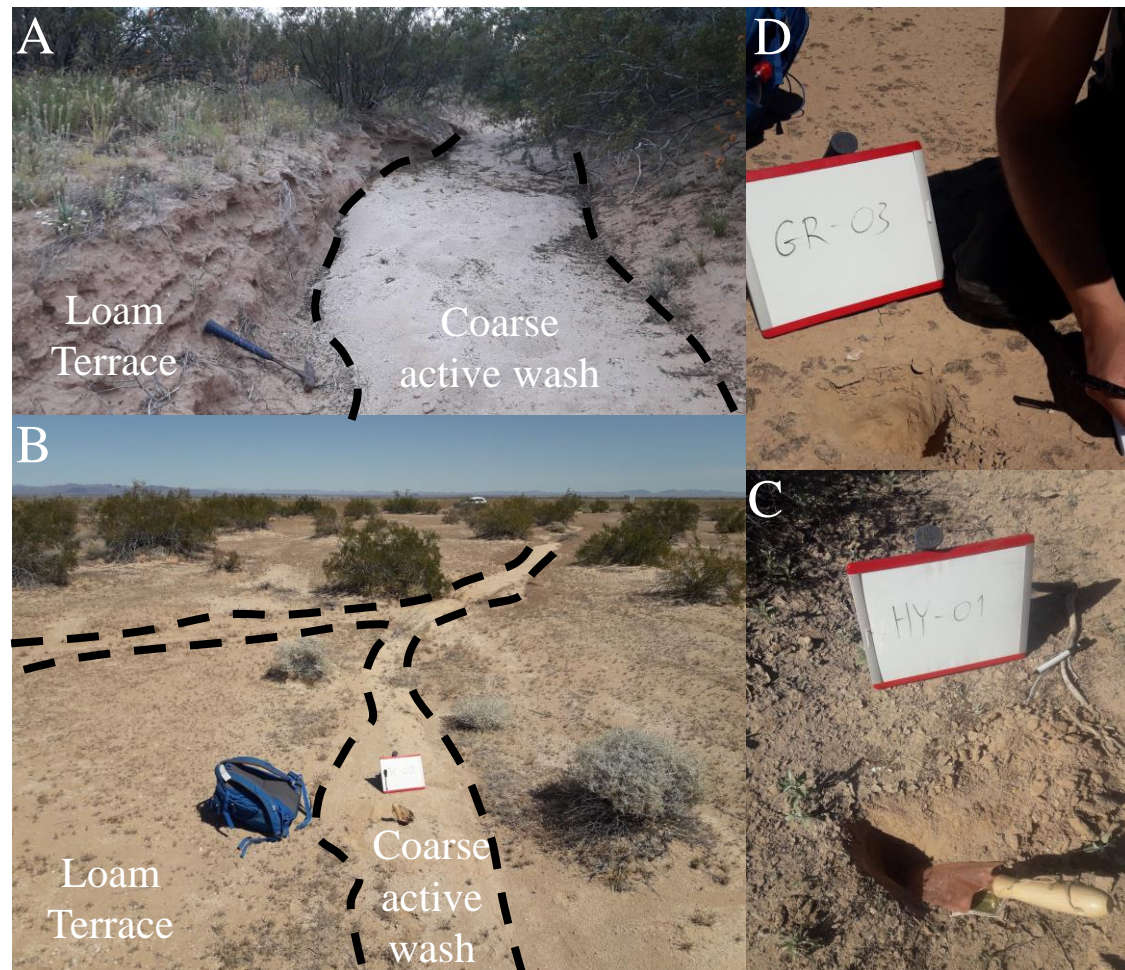

Figure S6. Field photos of alluvial fans: A. Mobile alluvial fan (MB) composed of loam textured terraces incised by 3 m wide active washes, rich with sand; B. Tacna alluvial fan (TC) composed of bare loam textured terraces incised by 2 m wide active washes, rich with sand; C. Terrace at Hyder (HY) alluvial fan, characterized by loam textured sediments and low coverage of vegetation and gravels; D. Terrace at Growler (GR) alluvial fan characterized by bare surface and silt loam textured sediments.

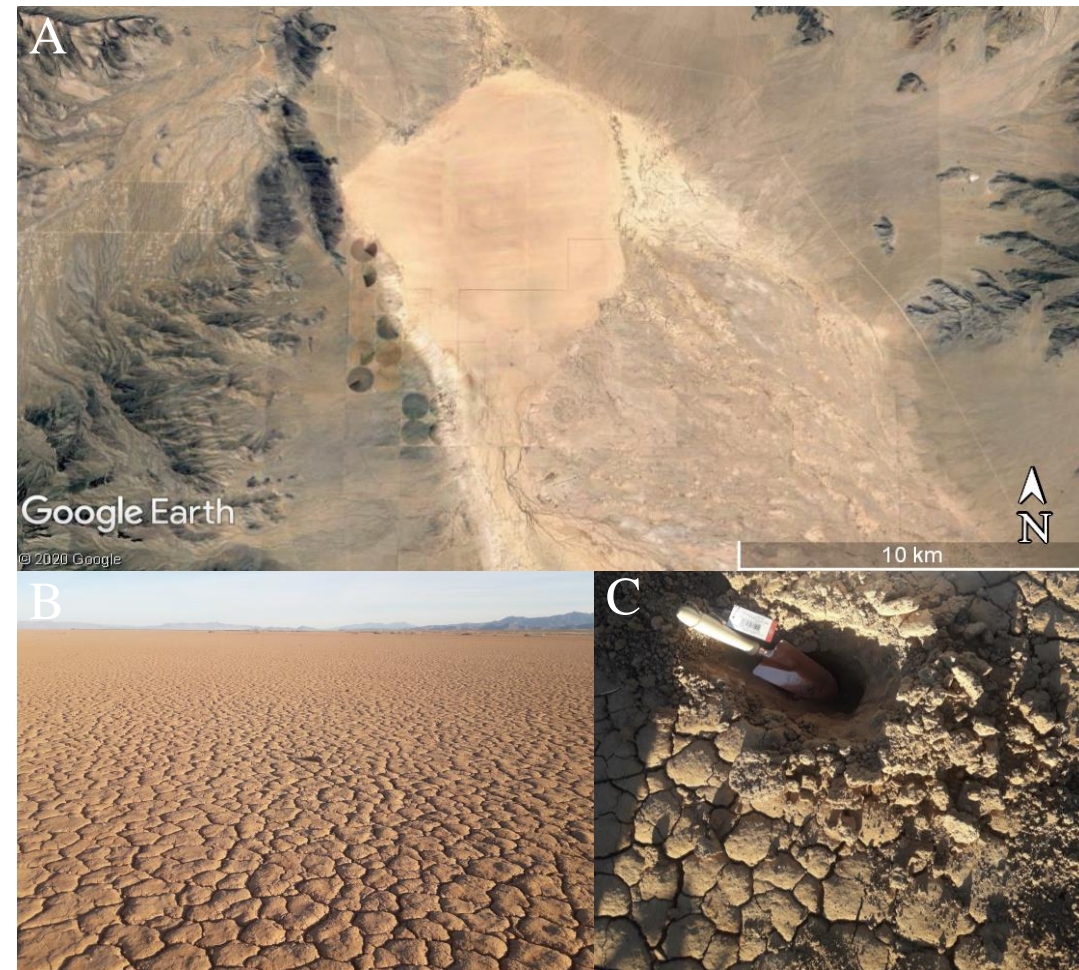

Figure S7. A. Aerial photo (via Google Earth) of Kingman playa (KG). Note that an active wash drains the plays to the south; B. and C. Field photos of the playa bare surface, showing a well-developed physical crust (mud polygons), the sediments beneath the crust are of silty clay texture.



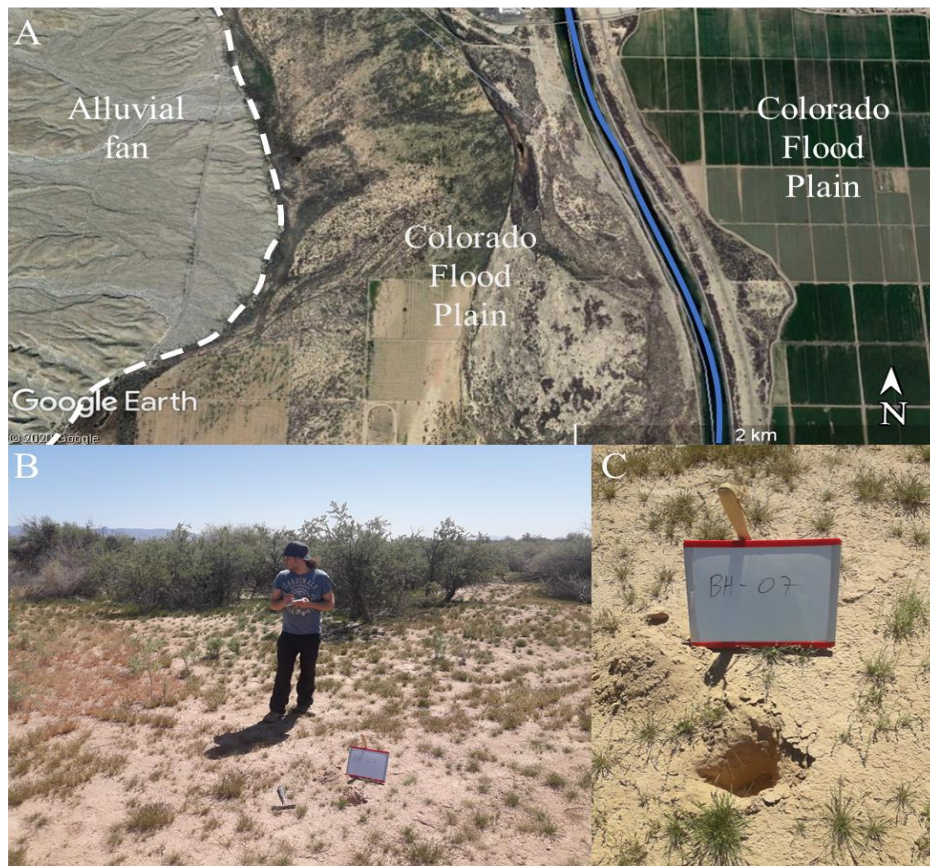

Figure S8. A. Aerial photo (via Google Earth) of Colorado River flood plains currently used for agriculture, and the current Colorado River (blue). B. and C. Field photos of the flood plains covered with annual vegetation, weak crust, and silt loam textured sediments.

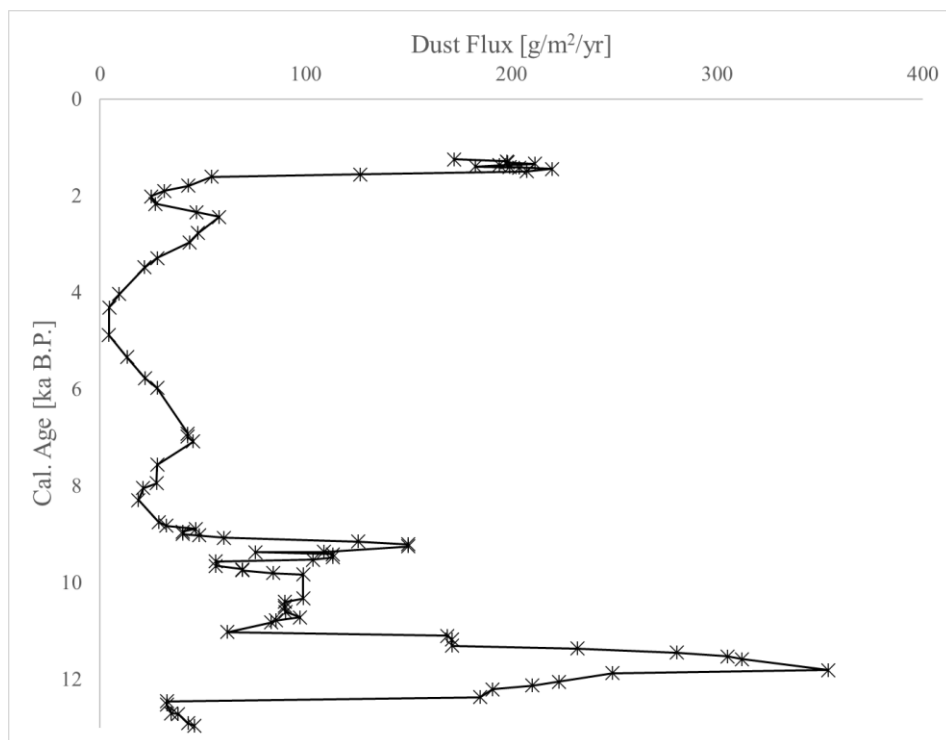

Figure S9. Moving average of total dust flux calculated according to equation 3, with AI values divided by the average UCC value instead of the average local bedrock value.

## References

- Arcusa, S.H., McKay, N.P., Routson, C.C., and Munoz, S.E., 2019, Dust-drought interactions over the last 15,000 years: A network of lake sediment records from the San Juan Mountains, Colorado: The Holocene, doi:10.1177/0959683619875192.
- Baddock, M.C., Ginoux, P., Bullard, J.E., and Gill, T.E., 2016, Do MODIS-defined dust sources have a geomorphological signature? *Geophysical Research Letters*, v. 43, p. 2606–2613, doi:10.1002/2015GL067327.
- Blaauw, M., and Christeny, J.A., 2011, Flexible paleoclimate age-depth models using an autoregressive gamma process: *Bayesian Analysis*, v. 6, p. 457–474, doi:10.1214/11-BA618.
- Breed, C., and Reheis, M., 1999, *Desert Winds: Monitoring Wind-Related Surface Processes in Arizona, New Mexico, and California*: U.S. Geological Survey Professional Paper 1598, p. 158, <http://dl.dropbox.com/u/1674920/Salinity/p1598so.pdf>.
- Brenner, I.B., Watson, A.E., Russell, G.M., and Goncalves, M., 1980, A new approach to the determination of the major and minor constituents in silicate and phosphate rocks: *Chemical Geology*, v. 28, p. 321–330.
- Crouvi, O., Amit, R., Enzel, Y., Porat, N., and Sandler, A., 2008, Sand dunes as a major proximal dust source for late Pleistocene loess in the Negev Desert, Israel: *Quaternary Research*, v. 70, p. 275–282, doi:10.1016/j.yqres.2008.04.011.
- Davis, O.K., and Shafer, D.S., 1992, A Holocene climatic record for the Sonoran Desert from pollen analysis of Montezuma Well, Arizona, USA: *Palaeogeography, Palaeoclimatology, Palaeoecology*, v. 92, p. 107–119, doi:10.1016/0031-0182(92)90137-T.
- Dietze, E., Hartmann, K., Diekmann, B., Imker, J., Lehmkuhl, F., Opitz, S., Stauch, G., Wünnemann, B., and Borchers, A., 2012, An end-member algorithm for deciphering modern detrital processes from lake sediments of Lake Donggi Cona, NE Tibetan Plateau, China: *Sedimentary Geology*, v. 243–244, p. 169–180, doi:10.1016/j.sedgeo.2011.09.014.
- Draxler, R.R., and Hess, G.D., 1998, An overview of the HYSPLIT-4 modelling system for trajectories, dispersion and deposition: *Australian Meteorological Magazine*, v. 47, p. 295–308.
- Ginoux, P., Garbuzov, D., and Hsu, N.C., 2010, Identification of anthropogenic and natural dust sources using moderate resolution imaging spectroradiometer (MODIS) deep blue level 2 data: *Journal of Geophysical Research Atmospheres*, v. 115, p. 1–10, doi:10.1029/2009JD012398.
- Longman, J., Veres, D., Ersek, V., Salzmann, U., Hubay, K., Bormann, M., Wennrich, V., and Schäbitz, F., 2017, Periodic input of dust over the Eastern Carpathians during the Holocene linked with Saharan desertification and human impact: *Climate of the Past*, v. 13, p. 897–917, doi:10.5194/cp-13-897-2017.
- Paterson, G.A., and Heslop, D., 2015, New methods for unmixing sediment grain size data: *Geochemistry, Geophysics, Geosystems*, p. 4494–4506, doi:10.1002/2015GC006070.

- Pratte, S., Garneau, M., and De Vleeschouwer, F., 2017, Increased atmospheric dust deposition during the Neoglacial in a boreal peat bog from north-eastern Canada: Palaeogeography, Palaeoclimatology, Palaeoecology, v. 469, p. 34–46, doi:10.1016/j.palaeo.2016.12.036.
- Reimer, P.J., Edouard Bard, B., Alex Bayliss, B., Warren Beck, B.J., Paul Blackwell, B.G., and Christopher Bronk Ramsey, B., 2013, Intcal13 and Marine13 Radiocarbon Age Calibration Curves 0–50,000 Years Cal Bp: Radiocarbon, v. 55, p. 1869–1887, doi:10.1017/S0033822200048864.
- Weltje, G.J., 1997, End-member modeling of compositional data: Numerical-statistical algorithms for solving the explicit mixing problem: Mathematical Geology, v. 29, p. 503–549, doi:10.1007/bf02775085.
- Weltje, G.J., and Prins, M.A., 2003, Muddled or mixed? Inferring palaeoclimate from size distributions of deep-sea clastics: Sedimentary Geology, v. 162, p. 39–62, doi:10.1016/S0037-0738(03)00235-5.
- Yu, Z., Robinson, P., and McGoldrick, P., 2001, An evaluation of methods for the chemical decomposition of geological materials for trace element determination using ICP-MS: Geostandards Newsletter, v. 25, p. 199–217, doi:10.1111/j.1751-908x.2001.tb00596.x.
